# Supplementary material for: Short and long-term follow-up and clinical outcomes in patients with celiac disease in a large private practice setting
Source: Springer Nature journal article supplement (doi:10.1186/s12876-023-02643-4), 2023-01-11
Supplement: MOESM1 [file 23911810]

**SUPPLEMENTARY APPENDIX**

| Symptoms              | Dietitian Referral                |       |       | Statistics |            |         |                                        |
|-----------------------|-----------------------------------|-------|-------|------------|------------|---------|----------------------------------------|
|                       | Frequency Percent Row Pct Col Pct | No    | Yes   | Total      | Chi-Square | p-value | Fisher's Exact Test, two-sided p-value |
| <b>Abdominal Pain</b> |                                   |       |       |            |            |         |                                        |
| No                    | 24                                | 56    | 80    |            | 0.9958     | 0.3183  | 0.4167                                 |
|                       | 23.76                             | 55.45 | 79.21 |            |            |         |                                        |
|                       | 85.71                             | 76.71 |       |            |            |         |                                        |
|                       | 30                                | 70    |       |            |            |         |                                        |
| Yes                   | 4                                 | 17    | 21    |            |            |         |                                        |
|                       | 3.96                              | 16.83 | 20.79 |            |            |         |                                        |
|                       | 14.29                             | 23.29 |       |            |            |         |                                        |
|                       | 19.05                             | 80.95 |       |            |            |         |                                        |
| Total                 | 28                                | 73    | 101   |            |            |         |                                        |
|                       | 27.72                             | 72.28 | 100   |            |            |         |                                        |
| <b>Bloating</b>       |                                   |       |       |            |            |         |                                        |
| No                    | 27                                | 64    | 91    |            | 1.7398     | 0.1872  | 0.2763                                 |
|                       | 26.73                             | 63.37 | 90.1  |            |            |         |                                        |
|                       | 96.43                             | 87.67 |       |            |            |         |                                        |
|                       | 29.67                             | 70.33 |       |            |            |         |                                        |
| Yes                   | 1                                 | 9     | 10    |            |            |         |                                        |
|                       | 0.99                              | 8.91  | 9.9   |            |            |         |                                        |
|                       | 3.57                              | 12.33 |       |            |            |         |                                        |
|                       | 10                                | 90    |       |            |            |         |                                        |
| Total                 | 28                                | 73    | 101   |            |            |         |                                        |
|                       | 27.72                             | 72.28 | 100   |            |            |         |                                        |
| <b>Flatulence</b>     |                                   |       |       |            |            |         |                                        |
| No                    | 27                                | 71    | 98    |            | 0.0486     | 0.8256  | 1.0000                                 |
|                       | 26.73                             | 70.3  | 97.03 |            |            |         |                                        |
|                       | 96.43                             | 97.26 |       |            |            |         |                                        |
|                       | 27.55                             | 72.45 |       |            |            |         |                                        |
| Yes                   | 1                                 | 2     | 3     |            |            |         |                                        |
|                       | 0.99                              | 1.98  | 2.97  |            |            |         |                                        |
|                       | 3.57                              | 2.74  |       |            |            |         |                                        |
|                       | 33.33                             | 66.67 |       |            |            |         |                                        |
| Total                 | 28                                | 73    | 101   |            |            |         |                                        |
|                       | 27.72                             | 72.28 | 100   |            |            |         |                                        |
| <b>Diarrhea</b>       |                                   |       |       |            |            |         |                                        |
| No                    | 23                                | 59    | 82    |            | 0.0231     | 0.8791  | 1.0000                                 |
|                       | 22.77                             | 58.42 | 81.19 |            |            |         |                                        |
|                       | 82.14                             | 80.82 |       |            |            |         |                                        |
|                       | 28.05                             | 71.95 |       |            |            |         |                                        |
| Yes                   | 5                                 | 14    | 19    |            |            |         |                                        |
|                       | 4.95                              | 13.86 | 18.81 |            |            |         |                                        |
|                       | 17.86                             | 19.18 |       |            |            |         |                                        |
|                       | 26.32                             | 73.68 |       |            |            |         |                                        |
| Total                 | 28                                | 73    | 101   |            |            |         |                                        |
|                       | 27.72                             | 72.28 | 100   |            |            |         |                                        |

| Symptoms              | Dietitian Referral                |       |       | Statistics |            |         |                                        |
|-----------------------|-----------------------------------|-------|-------|------------|------------|---------|----------------------------------------|
|                       | Frequency Percent Row Pct Col Pct | No    | Yes   | Total      | Chi-Square | p-value | Fisher's Exact Test, two-sided p-value |
| <b>Weight loss</b>    |                                   |       |       |            |            |         |                                        |
| No                    | 25                                | 69    | 94    |            | 0.8598     | 0.3538  | 0.3928                                 |
|                       | 24.75                             | 68.32 | 93.07 |            |            |         |                                        |
|                       | 89.29                             | 94.52 |       |            |            |         |                                        |
|                       | 26.6                              | 73.4  |       |            |            |         |                                        |
| Yes                   | 3                                 | 4     | 7     |            |            |         |                                        |
|                       | 2.97                              | 3.96  | 6.93  |            |            |         |                                        |
|                       | 10.71                             | 5.48  |       |            |            |         |                                        |
|                       | 42.86                             | 57.14 |       |            |            |         |                                        |
| Total                 | 28                                | 73    | 101   |            |            |         |                                        |
|                       | 27.72                             | 72.28 | 100   |            |            |         |                                        |
| <b>Nausea</b>         |                                   |       |       |            |            |         |                                        |
| No                    | 27                                | 70    | 97    |            | 0.0154     | 0.9012  | 1.0000                                 |
|                       | 26.73                             | 69.31 | 96.04 |            |            |         |                                        |
|                       | 96.43                             | 95.89 |       |            |            |         |                                        |
|                       | 27.84                             | 72.16 |       |            |            |         |                                        |
| Yes                   | 1                                 | 3     | 4     |            |            |         |                                        |
|                       | 0.99                              | 2.97  | 3.96  |            |            |         |                                        |
|                       | 3.57                              | 4.11  |       |            |            |         |                                        |
|                       | 25                                | 75    |       |            |            |         |                                        |
| Total                 | 28                                | 73    | 101   |            |            |         |                                        |
|                       | 27.72                             | 72.28 | 100   |            |            |         |                                        |
| <b>Anemia/Fatigue</b> |                                   |       |       |            |            |         |                                        |
| No                    | 28                                | 75    | 103   |            | 2.6113     | 0.1061  | 0.2788                                 |
|                       | 26.92                             | 72.12 | 99.04 |            |            |         |                                        |
|                       | 96.55                             | 100   |       |            |            |         |                                        |
|                       | 27.18                             | 72.82 |       |            |            |         |                                        |
| Yes                   | 1                                 | 0     | 1     |            |            |         |                                        |
|                       | 0.96                              | 0     | 0.96  |            |            |         |                                        |
|                       | 3.45                              | 0     |       |            |            |         |                                        |
|                       | 100                               | 0     |       |            |            |         |                                        |
| Total                 | 29                                | 75    | 104   |            |            |         |                                        |
|                       | 27.88                             | 72.12 | 100   |            |            |         |                                        |

Table S1. Follow-up symptom analysis in cohorts with and without a dietitian referral

Short and Long-Term Follow-Up and Clinical Outcomes in Patients with Celiac Disease in a Large Private Practice Setting

| Symptoms           | Dietitian Referral            |                               |             | Statistics |         |                                        |
|--------------------|-------------------------------|-------------------------------|-------------|------------|---------|----------------------------------------|
| Frequency          |                               |                               |             |            |         |                                        |
| Percent            |                               |                               |             |            |         |                                        |
| Row Pct            |                               |                               |             |            |         |                                        |
| Col Pct            | No                            | Yes                           | Total       | Chi-Square | p-value | Fisher's Exact Test, two-sided p-value |
| <b>Symptomatic</b> |                               |                               |             | 0.3366     | 0.5618  | 0.6481                                 |
| No                 | 19<br>18.81<br>67.86<br>29.69 | 45<br>44.55<br>61.64<br>70.31 | 64<br>63.37 |            |         |                                        |
| Yes                | 9<br>8.91<br>32.14<br>24.32   | 28<br>27.72<br>38.36<br>75.68 | 37<br>36.63 |            |         |                                        |
| Total              | 28<br>27.72                   | 73<br>72.28                   | 101<br>100  |            |         |                                        |

Table S2. Follow-up symptom analysis with and without a RD referral

| Biopsy               | Dietitian Referral           |                               |              | Statistics |         |                                        |
|----------------------|------------------------------|-------------------------------|--------------|------------|---------|----------------------------------------|
| Frequency            |                              |                               |              |            |         |                                        |
| Percent              |                              |                               |              |            |         |                                        |
| Row Pct              |                              |                               |              |            |         |                                        |
| Col Pct              | No                           | Yes                           | Total        | Chi-Square | p-value | Fisher's Exact Test, two-sided p-value |
| <b>Repeat Biopsy</b> |                              |                               |              | 0.1206     | 0.7284  | 0.796                                  |
| No                   | 31<br>24.6<br>81.58<br>29.52 | 74<br>58.73<br>84.09<br>70.48 | 105<br>83.33 |            |         |                                        |
| Yes                  | 7<br>5.56<br>18.42<br>33.33  | 14<br>11.11<br>15.91<br>66.67 | 21<br>16.67  |            |         |                                        |
| Total                | 38<br>30.16                  | 88<br>69.84                   | 126<br>100   |            |         |                                        |

Table S3. Repeat biopsy analysis in cohorts with and without a dietitian referral

| Serology        | Dietitian Referral         |                               |             | Statistics |         |                                        |
|-----------------|----------------------------|-------------------------------|-------------|------------|---------|----------------------------------------|
| Frequency       |                            |                               |             |            |         |                                        |
| Percent         |                            |                               |             |            |         |                                        |
| Row Pct         |                            |                               |             |            |         |                                        |
| Col Pct         | No                         | Yes                           | Total       | Chi-Square | p-value | Fisher's Exact Test, two-sided p-value |
| <b>Serology</b> |                            |                               |             | 1.3714     | 0.2416  | 0.3013                                 |
| Abnormal        | 11<br>13.75<br>55<br>31.43 | 24<br>30<br>40<br>68.57       | 35<br>43.75 |            |         |                                        |
| Normal          | 9<br>11.25<br>45<br>20     | 36<br>45.00<br>60.00<br>80.00 | 45<br>56.25 |            |         |                                        |
| Total           | 20<br>25.00                | 60<br>75.00                   | 80<br>100   |            |         |                                        |

Table S4. Follow-up serology analysis with and without a RD referral

## Short and Long-Term Follow-Up and Clinical Outcomes in Patients with Celiac Disease in a Large Private Practice Setting

| Micronutrient Orders<br>Frequency<br>Percent<br>Row Pct<br>Col Pct | Dietitian Referral |       |       | Statistics | Fisher's Exact Test,<br>two-sided p-value |
|--------------------------------------------------------------------|--------------------|-------|-------|------------|-------------------------------------------|
|                                                                    | No                 | Yes   | Total |            |                                           |
| <b>Iron studies</b>                                                |                    |       |       | Chi-Square | p-value                                   |
| No                                                                 | 23                 | 36    | 59    | 4.1019     | 0.0428                                    |
|                                                                    | 18.25              | 28.57 | 46.83 |            | 0.0526                                    |
|                                                                    | 60.53              | 40.91 |       |            |                                           |
|                                                                    | 38.98              | 61.02 |       |            |                                           |
| Yes                                                                | 15                 | 52    | 67    |            |                                           |
|                                                                    | 11.9               | 41.27 | 53.17 |            |                                           |
|                                                                    | 39.47              | 59.09 |       |            |                                           |
|                                                                    | 22.39              | 77.61 |       |            |                                           |
| Total                                                              | 38                 | 88    | 126   |            |                                           |
|                                                                    | 30.16              | 69.84 | 100   |            |                                           |
| <b>Vitamin D studies</b>                                           |                    |       |       | 9.876      | 0.0017                                    |
| No                                                                 | 23                 | 27    | 50    |            | 0.0027                                    |
|                                                                    | 18.25              | 21.43 | 39.68 |            |                                           |
|                                                                    | 60.53              | 30.68 |       |            |                                           |
|                                                                    | 46                 | 54    |       |            |                                           |
| Yes                                                                | 15                 | 61    | 76    |            |                                           |
|                                                                    | 11.9               | 48.41 | 60.32 |            |                                           |
|                                                                    | 39.47              | 69.32 |       |            |                                           |
|                                                                    | 19.74              | 80.26 |       |            |                                           |
| Total                                                              | 38                 | 88    | 126   |            |                                           |
|                                                                    | 30.16              | 69.84 | 100   |            |                                           |
| <b>Copper studies</b>                                              |                    |       |       | 1.884      | 0.1699                                    |
| No                                                                 | 36                 | 76    | 112   |            | 0.2254                                    |
|                                                                    | 28.57              | 60.32 | 88.89 |            |                                           |
|                                                                    | 94.74              | 86.36 |       |            |                                           |
|                                                                    | 32.14              | 67.86 |       |            |                                           |
| Yes                                                                | 2                  | 12    | 14    |            |                                           |
|                                                                    | 1.59               | 9.52  | 11.11 |            |                                           |
|                                                                    | 5.26               | 13.64 |       |            |                                           |
|                                                                    | 14.29              | 85.71 |       |            |                                           |
| Total                                                              | 38                 | 88    | 126   |            |                                           |
|                                                                    | 30.16              | 69.84 | 100   |            |                                           |
| <b>Zinc studies</b>                                                |                    |       |       | 7.5966     | 0.0058                                    |
| No                                                                 | 35                 | 61    | 96    |            | 0.0058                                    |
|                                                                    | 27.78              | 48.41 | 76.19 |            |                                           |
|                                                                    | 92.11              | 69.32 |       |            |                                           |
|                                                                    | 36.46              | 63.54 |       |            |                                           |
| Yes                                                                | 3                  | 27    | 30    |            |                                           |
|                                                                    | 2.38               | 21.43 | 23.81 |            |                                           |
|                                                                    | 7.89               | 30.68 |       |            |                                           |
|                                                                    | 10                 | 90    |       |            |                                           |
| Total                                                              | 38                 | 88    | 126   |            |                                           |
|                                                                    | 30.16              | 69.84 | 100   |            |                                           |
| <b>Folate studies</b>                                              |                    |       |       | 4.6044     | 0.0319                                    |
| No                                                                 | 30                 | 52    | 82    |            | 0.0415                                    |
|                                                                    | 23.81              | 41.27 | 65.08 |            |                                           |
|                                                                    | 78.95              | 59.09 |       |            |                                           |
|                                                                    | 36.59              | 63.41 |       |            |                                           |
| Yes                                                                | 8                  | 36    | 44    |            |                                           |
|                                                                    | 6.35               | 28.57 | 34.92 |            |                                           |
|                                                                    | 21.05              | 40.91 |       |            |                                           |
|                                                                    | 18.18              | 81.82 |       |            |                                           |
| Total                                                              | 38                 | 88    | 126   |            |                                           |
|                                                                    | 30.16              | 69.84 | 100   |            |                                           |
| <b>Vitamin B12 studies</b>                                         |                    |       |       | 5.6069     | 0.0179                                    |
| No                                                                 | 30                 | 50    | 80    |            | 0.0258                                    |
|                                                                    | 23.81              | 39.68 | 63.49 |            |                                           |
|                                                                    | 78.95              | 56.82 |       |            |                                           |
|                                                                    | 37.5               | 62.5  |       |            |                                           |
| Yes                                                                | 8                  | 38    | 46    |            |                                           |
|                                                                    | 6.35               | 30.16 | 36.51 |            |                                           |
|                                                                    | 21.05              | 43.18 |       |            |                                           |
|                                                                    | 17.39              | 82.61 |       |            |                                           |
| Total                                                              | 38                 | 88    | 126   |            |                                           |
|                                                                    | 30.16              | 69.84 | 100   |            |                                           |

Table S5. Follow-up micronutrient study order analysis in cohorts with and without a dietitian referral

## Short and Long-Term Follow-Up and Clinical Outcomes in Patients with Celiac Disease in a Large Private Practice Setting

| Micronutrient Results             |       | Dietitian Referral |       | Statistics |                                        |
|-----------------------------------|-------|--------------------|-------|------------|----------------------------------------|
| Frequency Percent Row Pct Col Pct | No    | Yes                | Total | Chi-Square | Fisher's Exact Test, two-sided p-value |
| <b>Iron</b>                       |       |                    |       | 0.0167     | 0.9917                                 |
| Not Tested                        | 12    | 30                 | 42    |            |                                        |
|                                   | 11.54 | 28.85              | 40.38 |            |                                        |
|                                   | 41.38 | 40                 |       |            |                                        |
|                                   | 28.57 | 71.43              |       |            |                                        |
| Tested, not deficient             | 14    | 37                 | 51    |            |                                        |
|                                   | 13.46 | 35.58              | 49.04 |            |                                        |
|                                   | 48.28 | 49.33              |       |            |                                        |
|                                   | 27.45 | 72.55              |       |            |                                        |
| Tested, deficient                 | 3     | 8                  | 11    |            |                                        |
|                                   | 2.88  | 7.69               | 10.58 |            |                                        |
|                                   | 10.34 | 10.67              |       |            |                                        |
|                                   | 27.27 | 72.73              |       |            |                                        |
| Total                             | 29    | 75                 | 104   |            |                                        |
|                                   | 27.88 | 72.12              | 100   |            |                                        |
| <b>Vitamin D</b>                  |       |                    |       | 4.3559     | 0.1133                                 |
| Not Tested                        | 24    | 38                 | 62    |            |                                        |
|                                   | 19.05 | 30.16              | 49.21 |            |                                        |
|                                   | 63.16 | 43.18              |       |            |                                        |
|                                   | 38.71 | 61.29              |       |            |                                        |
| Tested, not deficient             | 10    | 33                 | 43    |            |                                        |
|                                   | 7.94  | 26.19              | 34.13 |            |                                        |
|                                   | 26.32 | 37.5               |       |            |                                        |
|                                   | 23.26 | 76.74              |       |            |                                        |
| Tested, deficient                 | 4     | 17                 | 21    |            |                                        |
|                                   | 3.17  | 13.49              | 16.67 |            |                                        |
|                                   | 10.53 | 19.32              |       |            |                                        |
|                                   | 19.05 | 80.95              |       |            |                                        |
| Total                             | 38    | 88                 | 126   |            |                                        |
|                                   | 30.16 | 69.84              | 100   |            |                                        |
| <b>Copper</b>                     |       |                    |       | 1.884      | 0.1699                                 |
| Not Tested                        | 36    | 76                 | 112   |            |                                        |
|                                   | 28.57 | 60.32              | 88.89 |            |                                        |
|                                   | 94.74 | 86.36              |       |            |                                        |
|                                   | 32.14 | 67.86              |       |            |                                        |
| Tested, not deficient             | 2     | 12                 | 14    |            |                                        |
|                                   | 1.59  | 9.52               | 11.11 |            |                                        |
|                                   | 5.26  | 13.64              |       |            |                                        |
|                                   | 14.29 | 85.71              |       |            |                                        |
| Tested, deficient                 | 0     | 0                  | 0     |            |                                        |
|                                   | 0.00  | 0.00               | 0.00  |            |                                        |
|                                   | 0.00  | 0.00               |       |            |                                        |
|                                   | 0.00  | 0.00               |       |            |                                        |
| Total                             | 38    | 88                 | 126   |            |                                        |
|                                   | 30.16 | 69.84              | 100   |            |                                        |
| <b>0.2254</b>                     |       |                    |       |            |                                        |

  

| Micronutrient Results             |       | Dietitian Referral |       | Statistics |                                        |
|-----------------------------------|-------|--------------------|-------|------------|----------------------------------------|
| Frequency Percent Row Pct Col Pct | No    | Yes                | Total | Chi-Square | Fisher's Exact Test, two-sided p-value |
| <b>Zinc</b>                       |       |                    |       | 0.1357     | 0.7126                                 |
| Not Tested                        | 0     | 0                  | 0     |            |                                        |
|                                   | 0.00  | 0.00               | 0.00  |            |                                        |
|                                   | 0.00  | 0.00               |       |            |                                        |
|                                   | 0.00  | 0.00               |       |            |                                        |
| Tested, not deficient             | 3     | 22                 | 25    |            |                                        |
|                                   | 11.54 | 84.62              | 96.15 |            |                                        |
|                                   | 100   | 95.65              |       |            |                                        |
|                                   | 12.00 | 88.00              |       |            |                                        |
| Tested, deficient                 | 0     | 1                  | 1     |            |                                        |
|                                   | 0     | 3.85               | 3.85  |            |                                        |
|                                   | 0     | 4.35               |       |            |                                        |
|                                   | 0     | 100                |       |            |                                        |
| Total                             | 3     | 23                 | 26    |            |                                        |
|                                   | 11.54 | 88.46              | 100   |            |                                        |
| <b>Folate</b>                     |       |                    |       | 0.5632     | 0.453                                  |
| Not Tested                        | 0     | 0                  | 0     |            |                                        |
|                                   | 0.00  | 0.00               | 0.00  |            |                                        |
|                                   | 0.00  | 0.00               |       |            |                                        |
|                                   | 0.00  | 0.00               |       |            |                                        |
| Tested, not deficient             | 6     | 31                 | 37    |            |                                        |
|                                   | 15.00 | 77.50              | 92.5  |            |                                        |
|                                   | 85.71 | 93.94              |       |            |                                        |
|                                   | 16.22 | 83.78              |       |            |                                        |
| Tested, deficient                 | 1     | 2                  | 3     |            |                                        |
|                                   | 2.50  | 5.00               | 7.50  |            |                                        |
|                                   | 14.29 | 6.06               |       |            |                                        |
|                                   | 33.33 | 66.67              |       |            |                                        |
| Total                             | 7     | 33                 | 40    |            |                                        |
|                                   | 17.50 | 82.50              | 100   |            |                                        |
| <b>Vitamin B12</b>                |       |                    |       | 0.4968     | 0.4809                                 |
| Not Tested                        | 0     | 0                  | 0     |            |                                        |
|                                   | 0.00  | 0.00               | 0.00  |            |                                        |
|                                   | 0.00  | 0.00               |       |            |                                        |
|                                   | 0.00  | 0.00               |       |            |                                        |
| Tested, not deficient             | 7     | 34                 | 41    |            |                                        |
|                                   | 15.91 | 77.27              | 93.18 |            |                                        |
|                                   | 87.5  | 94.44              |       |            |                                        |
|                                   | 17.07 | 82.93              |       |            |                                        |
| Tested, deficient                 | 1     | 2                  | 3     |            |                                        |
|                                   | 2.27  | 4.55               | 6.82  |            |                                        |
|                                   | 12.5  | 5.56               |       |            |                                        |
|                                   | 33.33 | 66.67              |       |            |                                        |
| Total                             | 8     | 36                 | 44    |            |                                        |
|                                   | 18.18 | 81.82              | 100   |            |                                        |
| <b>0.4478</b>                     |       |                    |       |            |                                        |

Table S6. Follow-up micronutrient study testing and deficiency analysis in cohorts with and without a dietitian referral

## Short and Long-Term Follow-Up and Clinical Outcomes in Patients with Celiac Disease in a Large Private Practice Setting

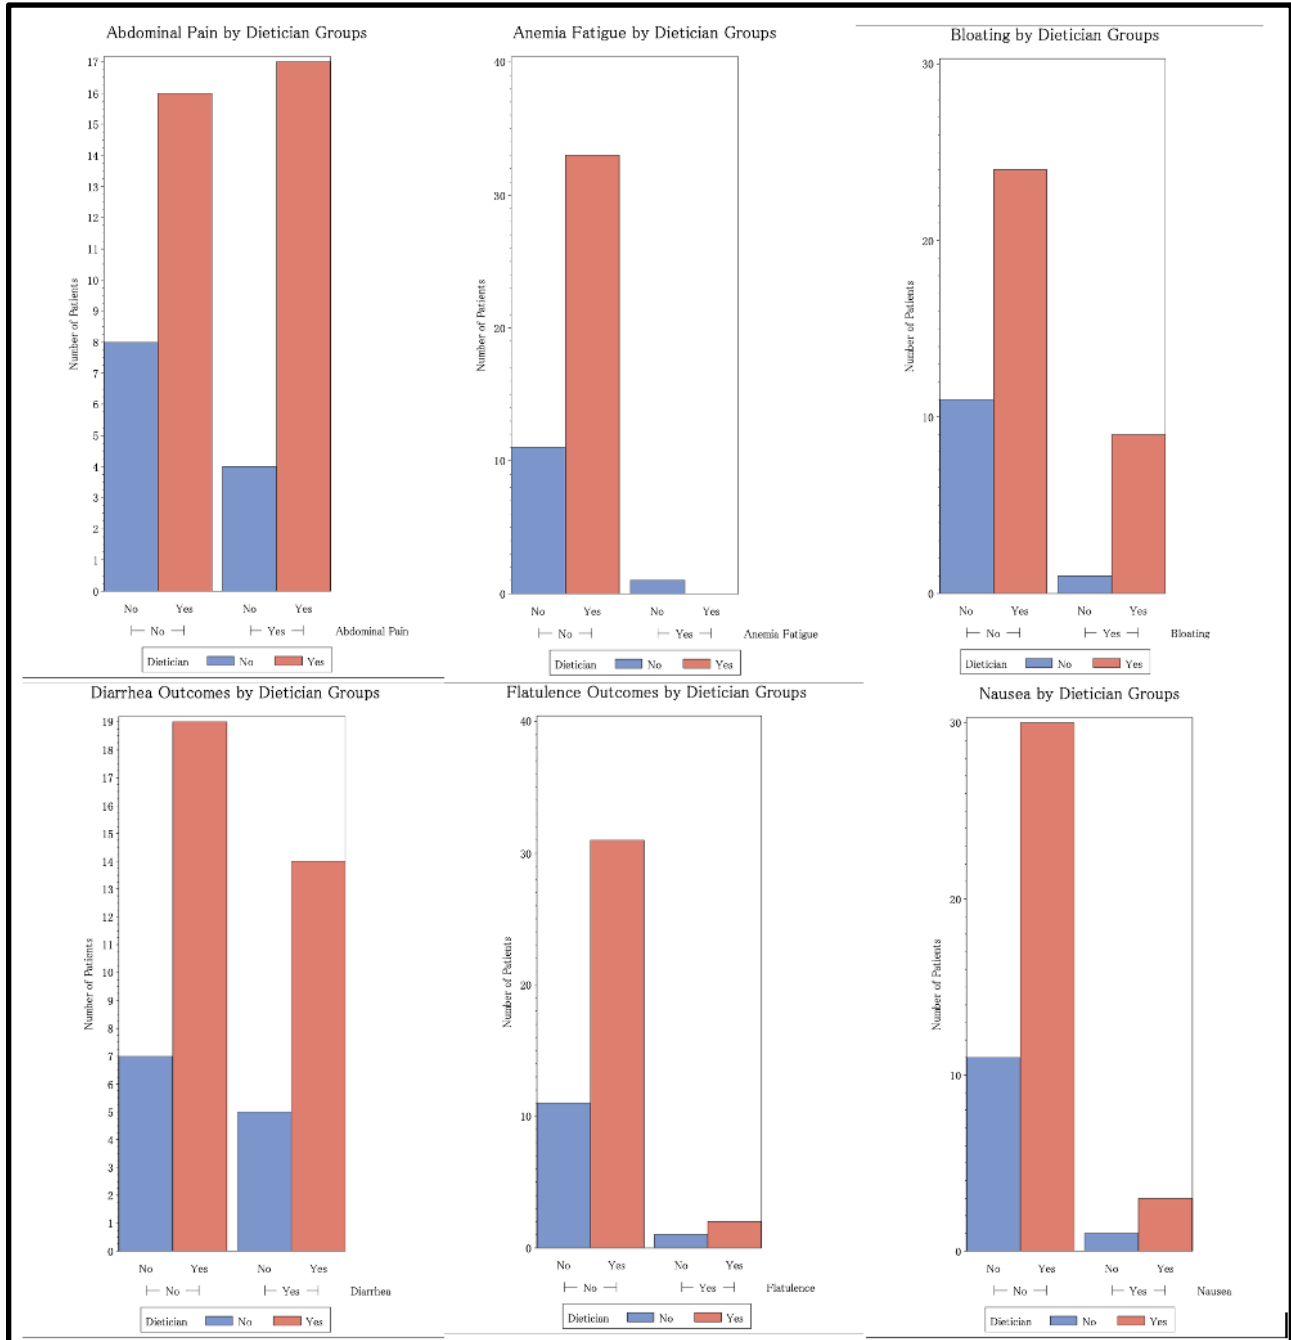

Figure S1. Follow-up symptom results in cohorts with and without a dietitian referral

# Short and Long-Term Follow-Up and Clinical Outcomes in Patients with Celiac Disease in a Large Private Practice Setting

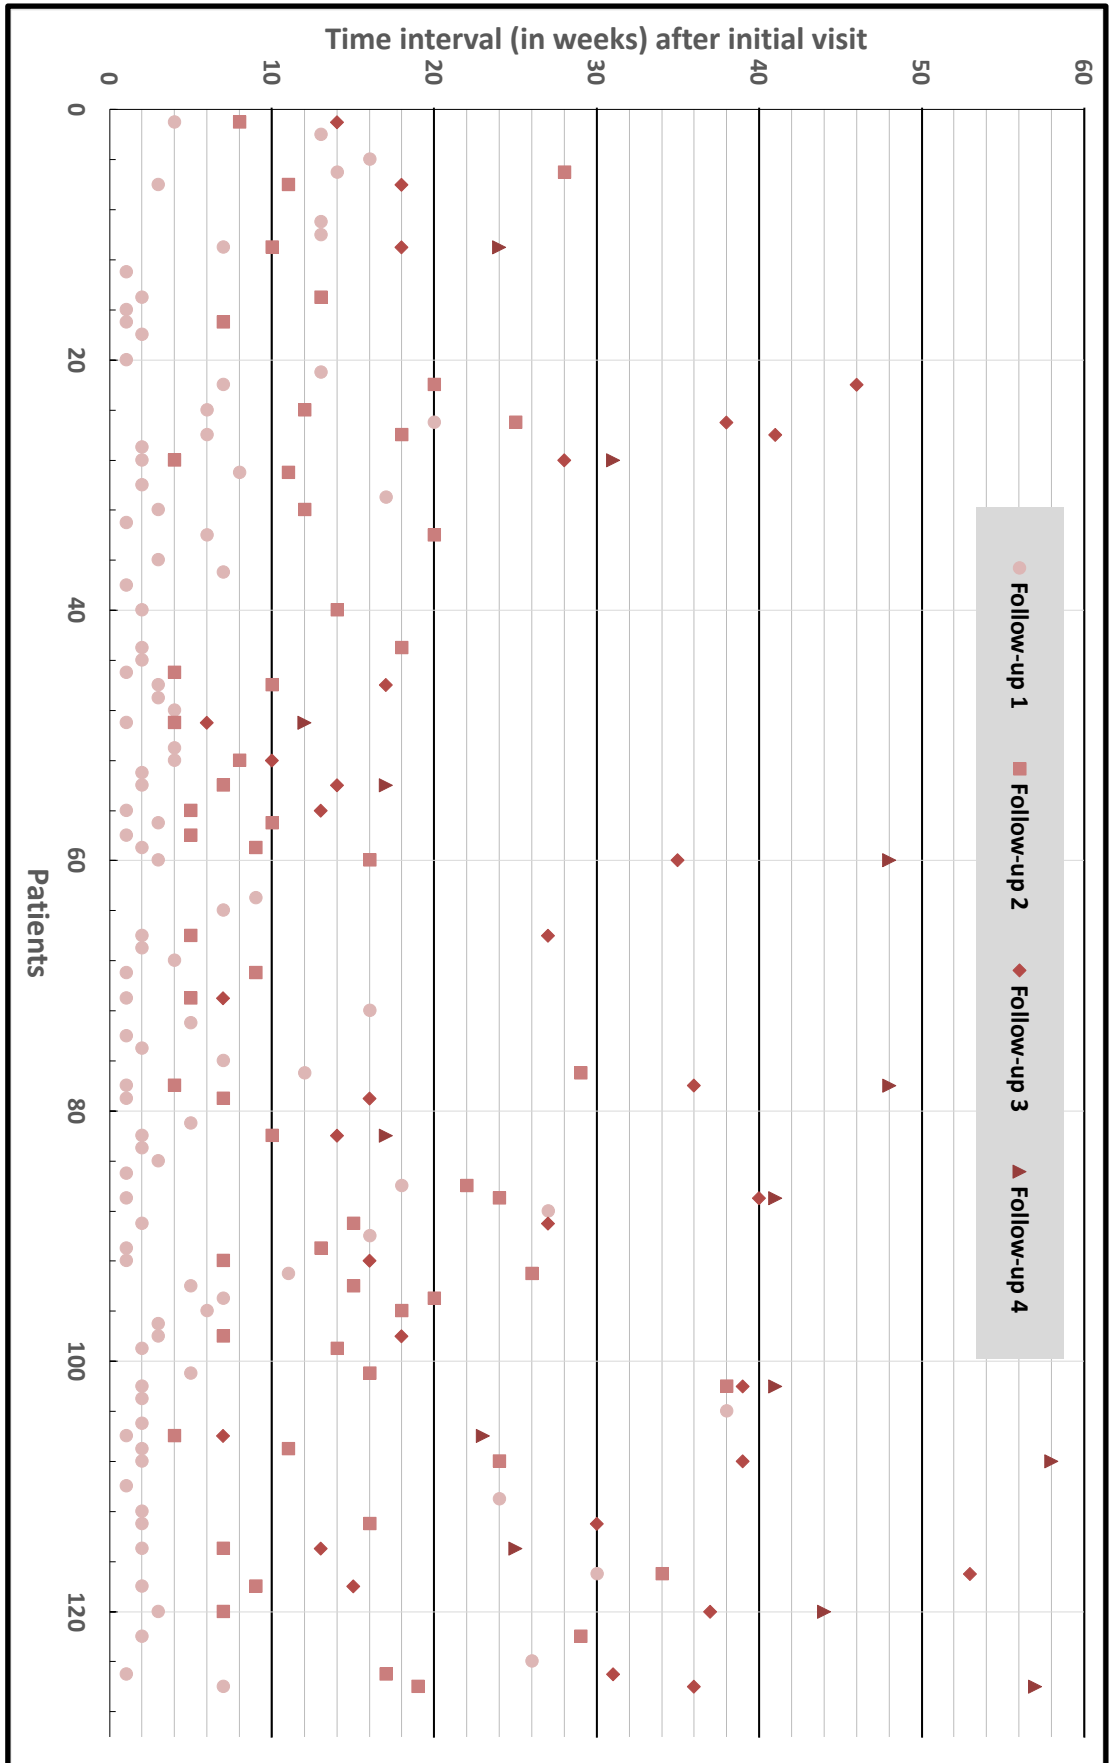

Figure S2. Time interval (in weeks) between initial and follow-up visits
